# Supplementary material for: Molecular Detection of Hematozoa Infections in Tundra Swans Relative to Migration Patterns and Ecological Conditions at Breeding Grounds
Source: PLoS One. 2012 Sep 25;7(9):e45789. doi: 10.1371/journal.pone.0045789 (PMC3458064; doi:10.1371/journal.pone.0045789)
Supplement: Table S3 — Model selection results using the information theoretic approach with unresolved samples considered as positive for infection. (XLSX) [file pone.0045789.s004.xlsx]

## Sheet: S3 model selection unresolved +
Predicting Leucocytozoon infection
	Model	AICc	ΔAICc	AICc Weights	Model Likelihood	Parameters	Deviance	R-squared
	{ψ area, ρ hematozoa prevalence}	451.383	0	0.83309	1	4	443.25
	{ψ wind, ρ hematozoa prevalence}	454.598	3.2154	0.16691	0.2004	3	448.519	0.953374
	{ψ migration duration, ρ hematozoa prevalence}	522.367	70.9838	0	0	3	516.288	0.353649
	{ψ migration distance, ρ hematozoa prevalence}	526.593	75.2097	0	0	3	520.513	0.316251
	{ψ temperature, ρ hematozoa prevalence}	541.275	89.8921	0	0	3	535.196	0.186317
	{ψ, ρ hematozoa prevalence}	560.289	108.906	0	0	2	556.25
Predicting Haemoproteus / Parahaemoproteus / Plasmodium infection
	Model	AICc	ΔAICc	AICc Weights	Model Likelihood	Parameters	Deviance	R-Squared
	{ψ area, ρ hematozoa prevalence}	305.712	0	0.9942	1	4	297.58
	{ψ wind, ρ hematozoa prevalence}	316.009	10.2964	0.00578	0.0058	3	309.93	0.936916
	{ψ temperature, ρ hematozoa prevalence}	327.209	21.4967	2e-05	0	3	321.13	0.879704
	{ψ migration duration, ρ hematozoa prevalence}	492.841	187.128	0	0	3	486.762	0.033633
	{ψ migration distance, ρ hematozoa prevalence}	495.277	189.564	0	0	3	489.198	0.0211901
	{ψ, ρ hematozoa prevalence}	497.385	191.673	0	0	2	493.346
